# Supplementary material
Source: HighWire-hosted journal article supplement (https://www.annfammed.org/highwire/filestream/8743/field_highwire_adjunct_files/0/Saver_Supp_App.pdf)
Supplement: Saver_Supp_App.pdf [file Saver_Supp_App.pdf]

Supplemental materials for:

Saver BG, Mazor K, Luckmann R, Cutrona S, Hayes M, Gorodetsky T, Esparza N, Bacigalupe G. Persuasive interventions for controversial cancer screening recommendations: testing a novel approach to help patients make evidence-based decisions. *Ann Fam Med*. 2017;15(1):48-55.

## **Supplemental Appendix 1. Overview of content/flow of final video interventions.**

---

### **Audio**

### **Visual**

#### **Narrator Introduction:**

Presentation will include new information:

- Consider whether screening is needed
- Screening may cause harm
- Experts may not recommend screening

Bulleted questions

#### **Physician-patient dialog**

End of an annual examination, question of screening raised

Physician/patient

Physician states s/he follows USPSTF recommendations; briefly summarizes recommendations; notes that screening could cause harm

Text and graphics related to testing and events that can follow a positive test, USPSTF, weighing benefits and harms

- Describes USPSTF, why s/he considers it trustworthy
- Provides information about the cancer: incidence, mortality, estimated benefit of screening, and harms of screening

Discussion of why some groups recommend screening. Details about benefits and harms of screening using statistics derived from the USPSTF evidence summaries.[Chou, 2011 #301; Nelson, 2009 #414]

Cates-type plots, animating color changes of dots as probabilities of outcomes, both benefits and harms, are introduced

Brief discussion of persons at elevated risk

Text/graphics

Reflection on personal values about balance of benefits and harms

Text/graphics

#### **Closing**

Patient decides not to get screened (prostate cancer)

Text/graphics

Or patient decides to think about it more (breast cancer) and is supported by physician in this decision.

List of sources for more information

Text

---

USPSTF = United States Preventive Services Task Force.

Note: Because of the differing content and situations, exact ordering of narrative flow differed somewhat between mammography and prostate cancer screening presentations.
